# Supplementary material for: Electromagnetic wave shielding flexible films with near-zero reflection in the 5G frequency band
Source: Royal Society of Chemistry journal article supplement (doi:10.1039/d1ta10065c), 2022-01-01
Supplement: d1ta10065c1.pdf [file d1ta10065c1.pdf]

## Supplementary Information

### Electromagnetic Wave Shielding Flexible Films with Near-Zero Reflection in the 5G Frequency Band

Seung Han Ryu<sup>†a</sup>, Byeongjin Park<sup>†a,\*</sup>, You Kyung Han<sup>a</sup>, Suk Jin Kwon<sup>a</sup>, Taehoon Kim<sup>a</sup>, Rachida Lamouri<sup>b</sup>, Ki Hyeon Kim<sup>b</sup>, Sang-Bok Lee<sup>a,\*</sup>

<sup>a</sup> Composites Research Division, Korea Institute of Materials Science, 797 Changwondaero, Seongsan-gu, Changwon, Gyeongsangnam-do 51508, Republic of Korea

<sup>b</sup> Department of Physics, Yeungnam University, Daehakro 280, Gyeongsan, Gyeongsangbuk-do 38541, Republic of Korea.

<sup>†</sup> These authors contributed equally to this work.

\*Corresponding authors. [b.park@kims.re.kr](mailto:b.park@kims.re.kr) (Byeongjin Park) and [leesb@kims.re.kr](mailto:leesb@kims.re.kr) (Sang-Bok Lee),

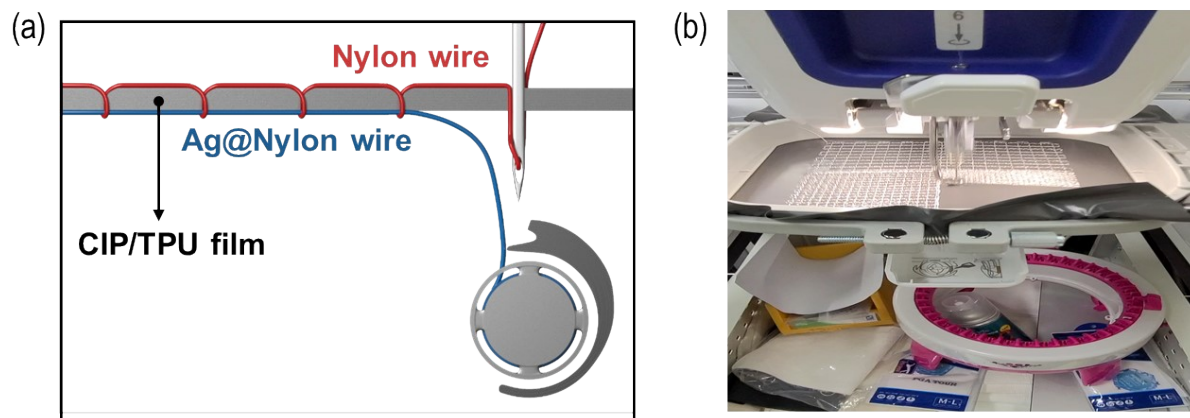

**Figure S1.** (a) Scheme of the experimental procedure of Ag@nylon wire stitching on the CIP/TPU composite and (b) captured image of sewing video.

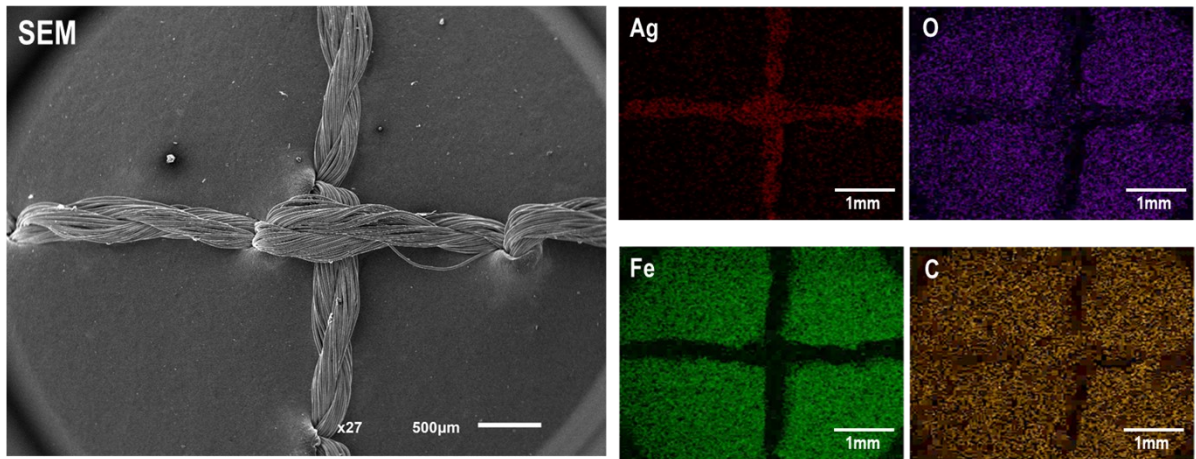

**Figure S2.** A scanning electron microscopic image (SEM image) of the proposed EMI shielding film and SEM-EDS mapping images of the film with spectra of Ag, O, Fe, and C.

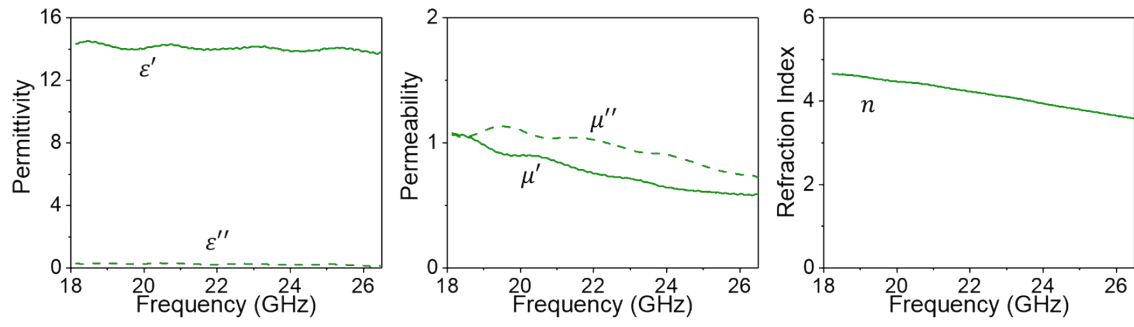

$$n = \sqrt{\mu_r \epsilon_r} = \sqrt{(1.06 + 1.078i)(14.33 + 0.2926i)} = |4.277 + 1.843i| = 4.657 \text{ @ 18 GHz, Average (K-band) } \sim 4.2$$

**Figure S3.** Permittivity, permeability and refractive index of CIP/TPU composite layer.

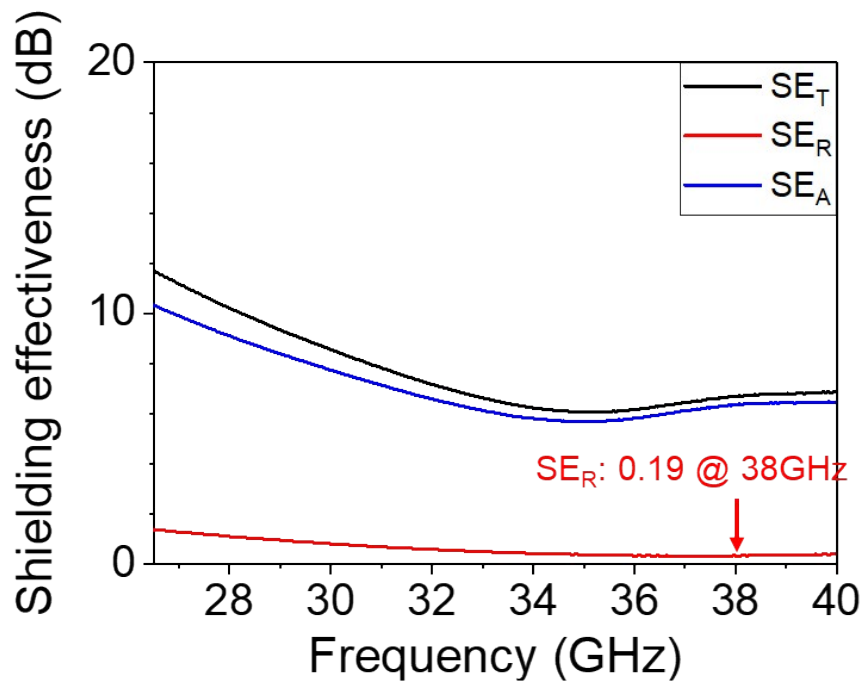

**Figure S4.** EMI shielding effectiveness of the shielding film with 1 mm grid period (Figure 3 (c)) in 26.5 – 40 GHz.

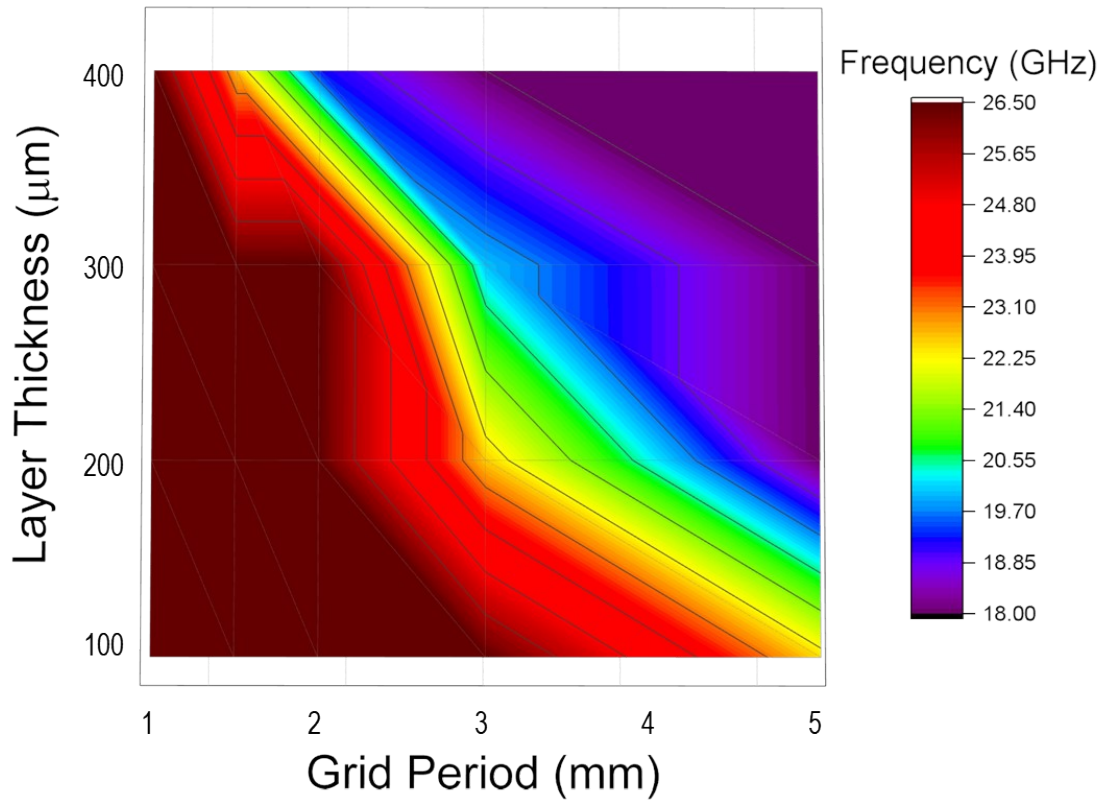

**Figure S5.** Visualized resonant frequencies of 16 different EMI shielding films with grid period from 1 to 5 mm and layer thickness from 100 to 400  $\mu\text{m}$ .

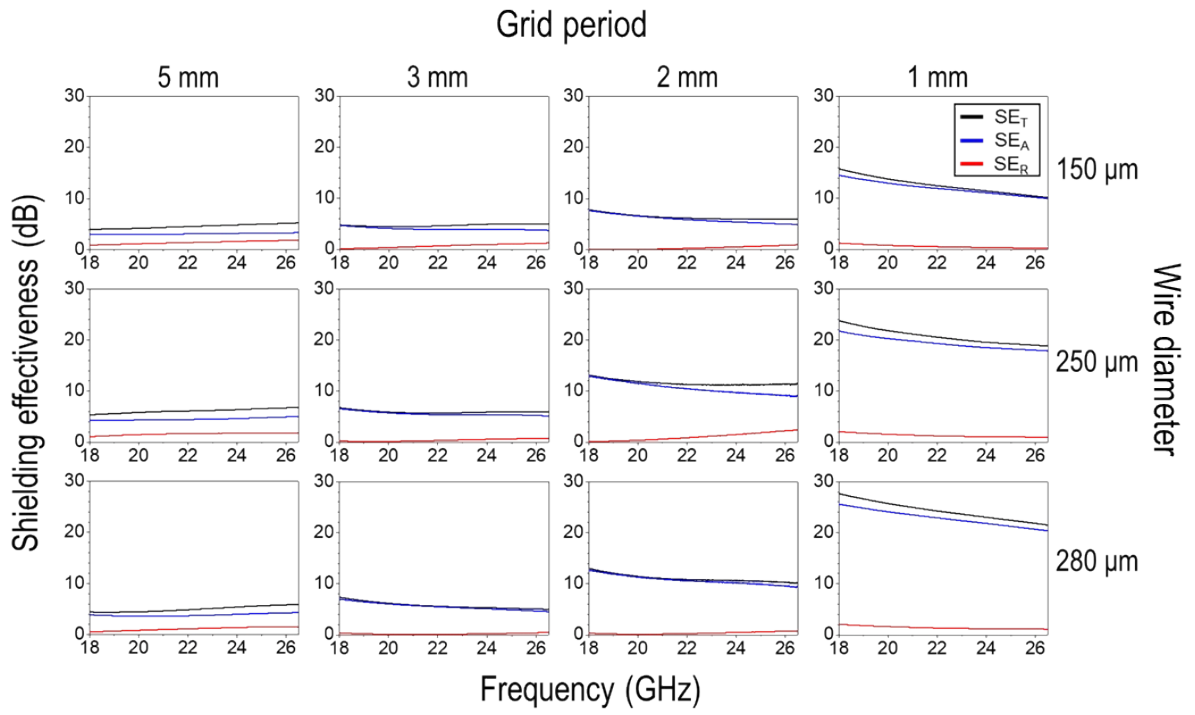

**Figure S6.** EMI shielding effectiveness of EMI shielding films with different grid geometries, grid periods (1-5 mm) and wire diameters (150-280 μm).

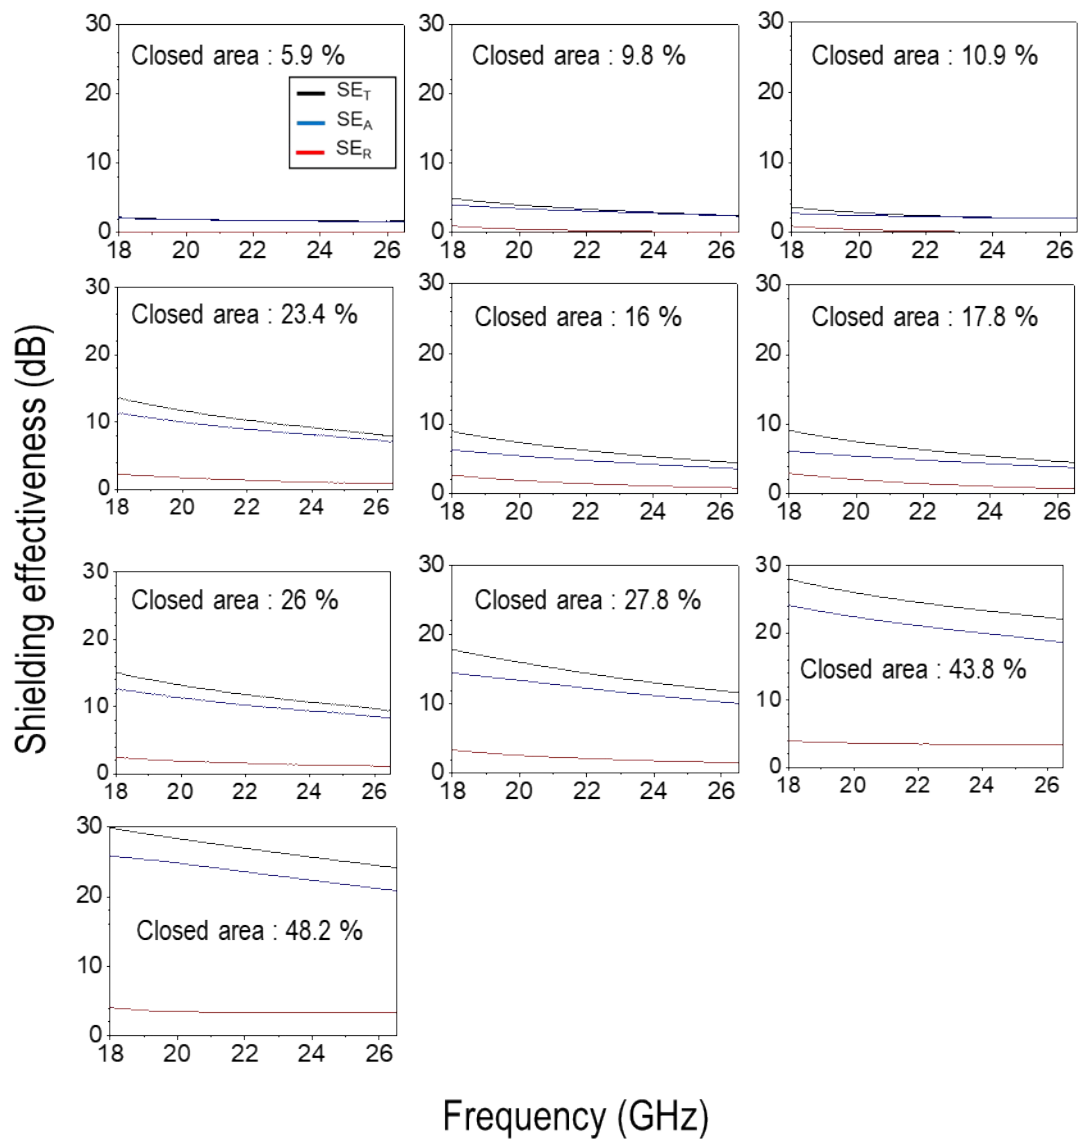

**Figure S7.** EMI shielding effectiveness of EMI shielding films with different closed areas (5.9-48.2%).



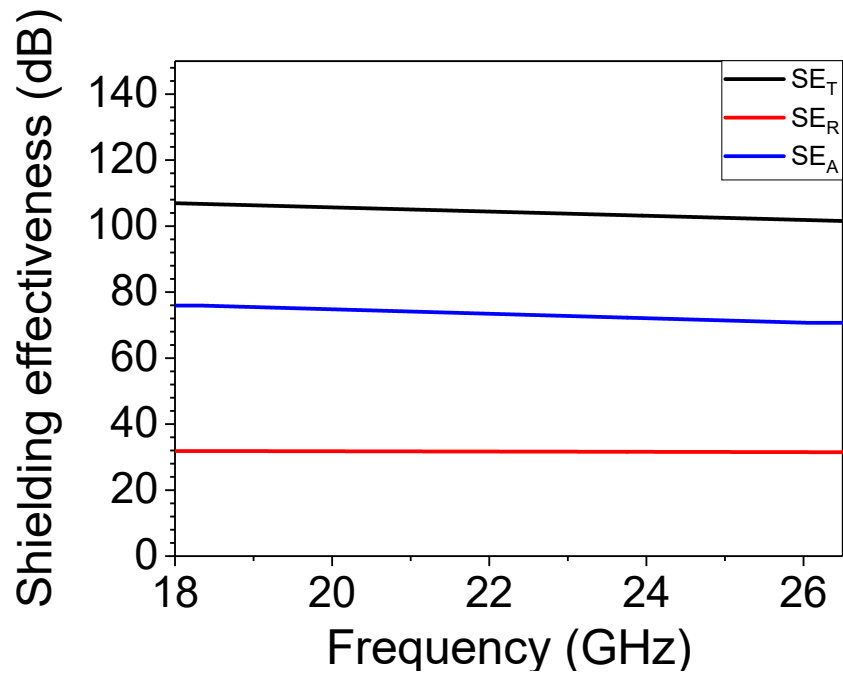

**Figure S8.** EMI shielding effectiveness of an aluminum foil.

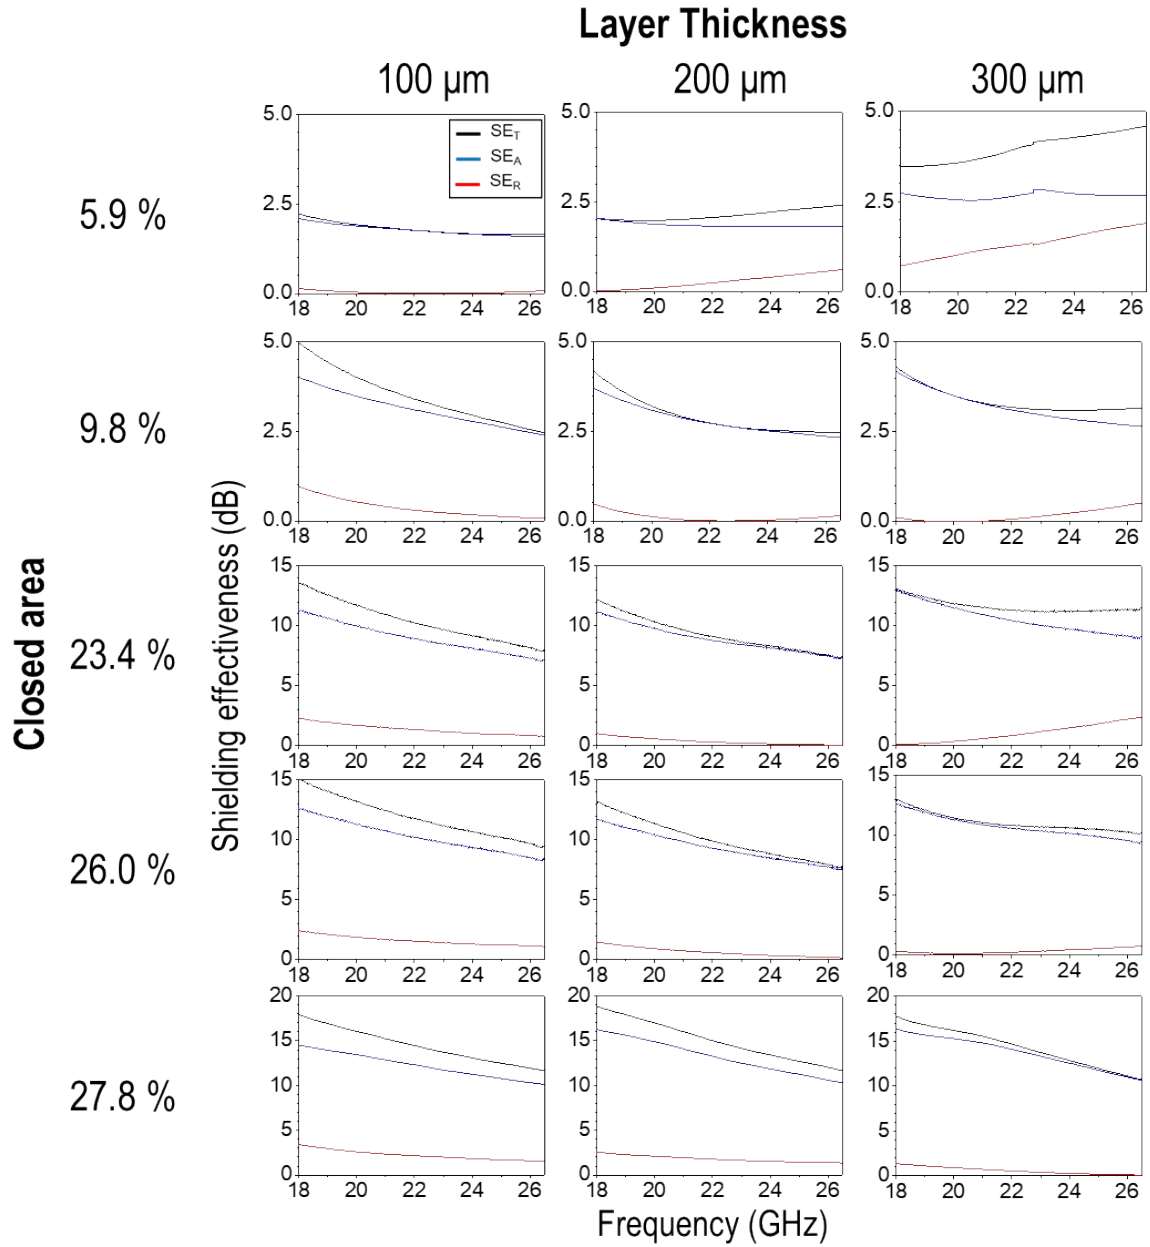

**Figure S9.** EMI shielding effectiveness of EMI shielding films with different film structures, composite layer thickness (100-300  $\mu\text{m}$ ) and closed areas (5.9-27.8%).

**Table S1.** Comparison with the previously reported EMI shielding materials at 26 GHz

| <b>Form</b>      | <b>Main Materials</b>     | <b>Thickness (mm)</b> | <b>SE<sub>R</sub> (dB)</b> | <b>SE<sub>A</sub> (dB)</b> | <b>R (%)</b> | <b>A (%)</b> | <b>Reference</b>       |
|------------------|---------------------------|-----------------------|----------------------------|----------------------------|--------------|--------------|------------------------|
| Film             | Metal                     | 0.18                  | 20                         | 70                         | 99.00        | 1.00         | [6]                    |
| Film             | Metal                     | 0.01                  | 10                         | 15                         | 90.00        | 9.68         | [7]                    |
| Film             | MXene                     | 1                     | 9.2                        | 67.8                       | 87.98        | 12.02        | [9]                    |
| Composite        | Graphene                  | 2.5                   | 3                          | 24                         | 49.88        | 49.92        | [10]                   |
| Composite        | Graphite                  | 5                     | 5                          | 35                         | 68.38        | 31.61        | [11]                   |
| Composite        | CNT                       | 0.5                   | 5.4                        | 9.7                        | 71.16        | 25.75        | [12]                   |
| Composite        | CNT                       | 0.5                   | 8.9                        | 42.4                       | 87.12        | 12.88        | [12]                   |
| Composite        | CNT                       | 0.1                   | 7.91                       | 14.5                       | 83.82        | 15.61        | [13]                   |
| Composite        | Graphene                  | 0.1                   | 8.76                       | 13.82                      | 86.70        | 12.75        | [13]                   |
| Film             | Graphene                  | 0.02                  | 11.3                       | 23.8                       | 92.59        | 7.38         | [15]                   |
| Composite        | CNT                       | 0.4                   | 9.3                        | 29.3                       | 88.25        | 11.74        | [16]                   |
| Composite        | Graphene                  | 0.4                   | 19.2                       | 14.5                       | 98.80        | 1.16         | [16]                   |
| Bulk             | Ferrite                   | 3.5                   | 0.5                        | 9.5                        | 10.87        | 79.13        | [28]                   |
| Composite        | Alloy                     | 2                     | 3.6                        | 10.4                       | 56.35        | 39.67        | [29]                   |
| Composite        | Alloy                     | 2                     | 2.1                        | 6.8                        | 38.34        | 48.78        | [29]                   |
| Composite        | Ferrite / CNT             | 0.7                   | 6.3                        | 16.2                       | 76.56        | 22.88        | [31]                   |
| Composite        | Ferrite / Graphene        | 1.1                   | 5.3                        | 30.3                       | 70.49        | 29.48        | [31]                   |
| Foam             | CNT                       | 5                     | 0.5                        | 25.5                       | 10.87        | 88.87        | [32]                   |
| Foam             | CNT                       | 3                     | 2.3                        | 23.89                      | 41.12        | 58.64        | [33]                   |
| Foam             | CNT                       | 5                     | 2.3                        | 47.3                       | 41.12        | 58.88        | [33]                   |
| <b>Composite</b> | <b>CIP / Ag@Nylon</b>     | <b>0.4</b>            | <b>0.01</b>                | <b>11.2</b>                | <b>0.23</b>  | <b>92.20</b> | <b>This Work (NZR)</b> |
| <b>Composite</b> | <b>CIP / CNT Ag@Nylon</b> | <b>0.5</b>            | <b>0.47</b>                | <b>24.2</b>                | <b>10.2</b>  | <b>89.40</b> | <b>This Work (Nzt)</b> |
